# Supplementary material for: Double D–π–A branched organic dye isomers for dye-sensitized solar cells
Source: Royal Society of Chemistry journal article supplement (doi:10.1039/c4ta03451a), 2014-01-01

Supporting Information for:

**Double D- $\pi$ -A Branched Organic Dye Isomers for  
Dye-Sensitized Solar Cells**

Shenghui Jiang, Suhua Fan, Xuefeng Lu, Gang Zhou,\* and Zhong-Sheng Wang\*

**Figure S1.** UV-vis absorption spectra of dye **D1** in chloroform solution with different concentration.

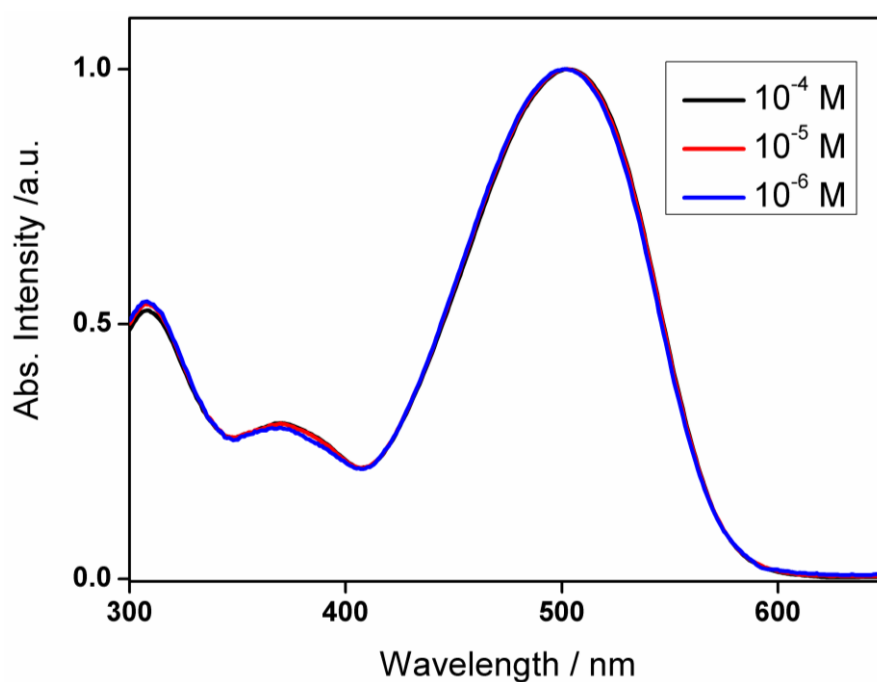

**Figure S2.** UV-vis absorption spectra of dye **D2** in chloroform solution with different concentration.

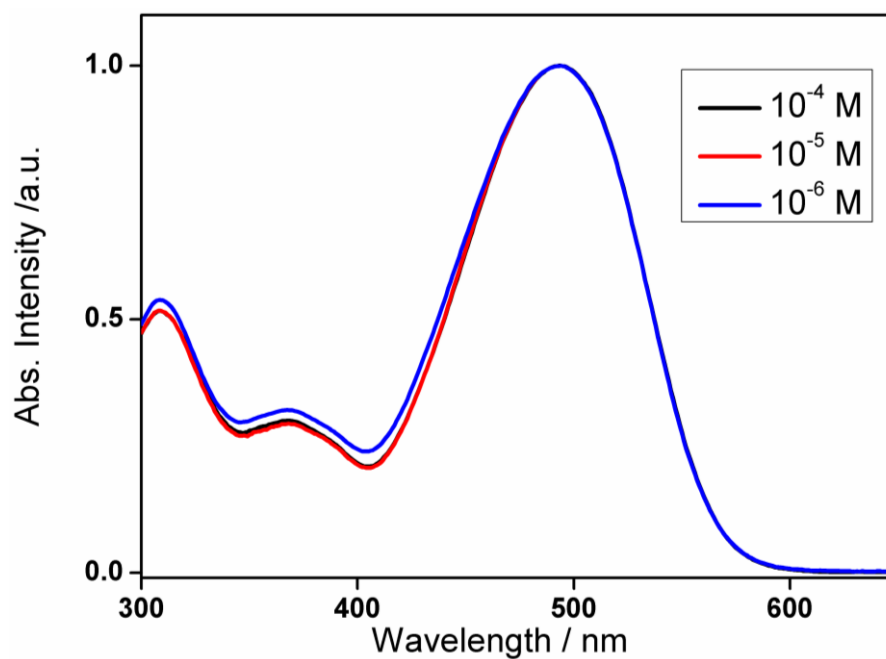

**Figure S3.** UV-vis absorption spectra of dye **D3** in chloroform solution with different concentration.

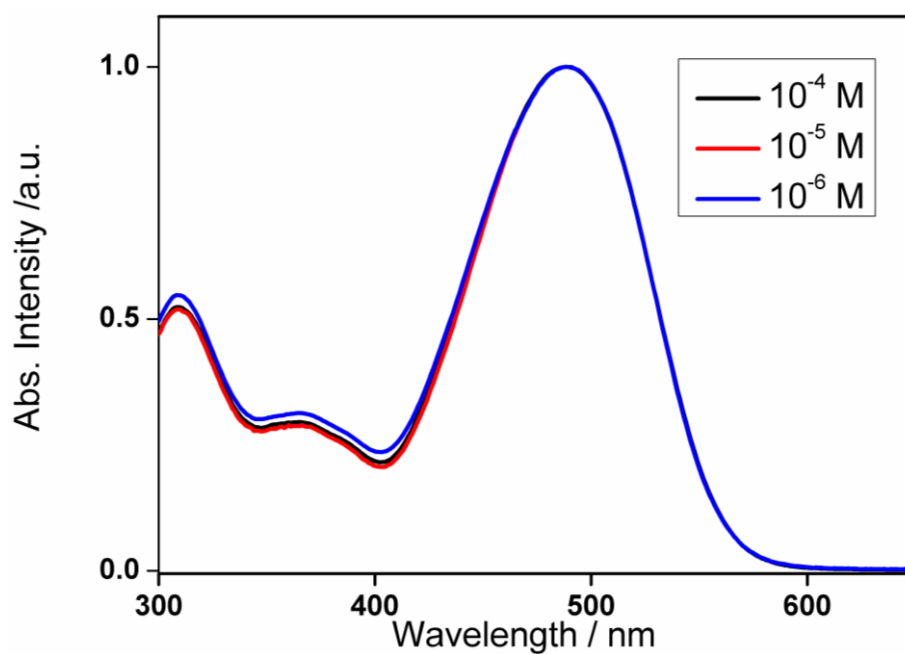

**Figure S4.** UV-vis absorption spectra of dye **S1** in chloroform solution with different concentration.

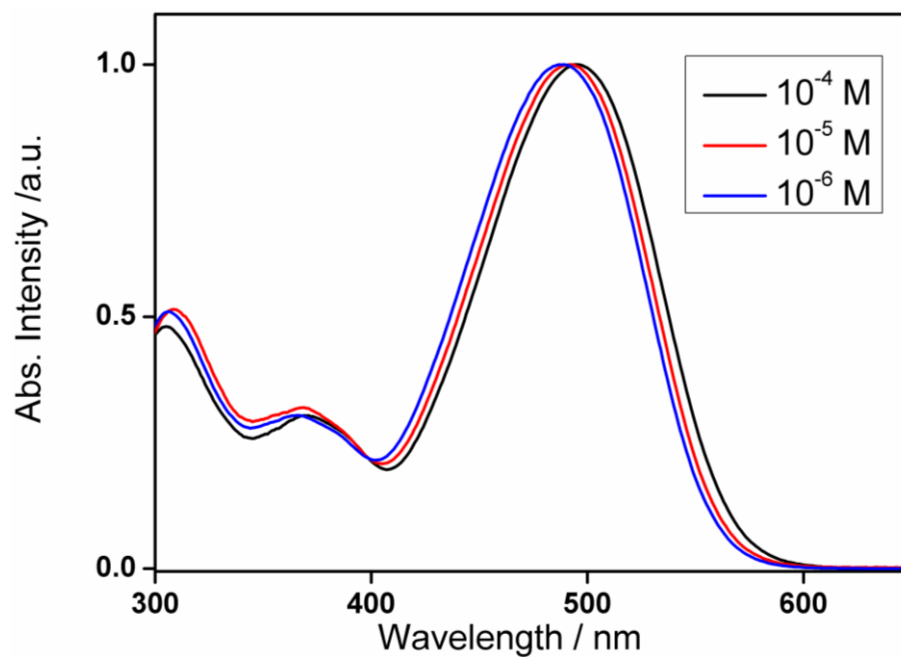

**Figure S5.** UV-vis absorption spectra of dye **S2** in chloroform solution with different concentration.

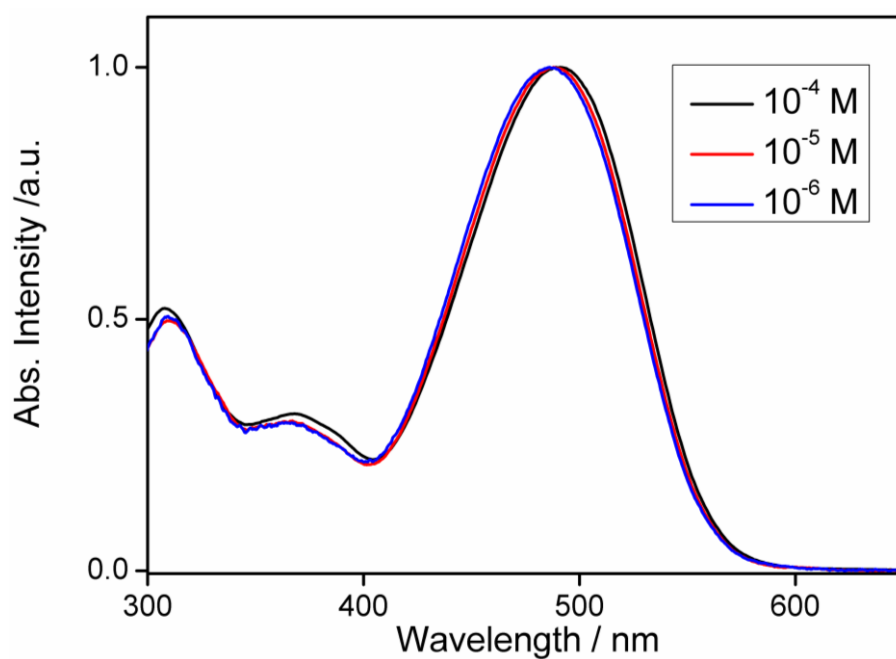

Supplement: c4ta03451a1.pdf [file c4ta03451a1.pdf]
